# Supplementary material for: Characterization of intratissue bacterial communities and isolation of Escherichia coli from oral lichen planus lesions
Source: PubMed Central journal article supplement (PMC7044275; doi:10.1038/s41598-020-60449-w), 2020-02-26
Supplement: 41598_2020_60449_MOESM1_ESM.pdf [file 41598_2020_60449_MOESM1_ESM.pdf]

# **Characterization of intratissue bacterial communities and isolation of *Escherichia coli* from oral lichen planus lesions**

Keumjin Baek<sup>1</sup>, Jaewon Lee<sup>1</sup>, Ahreum Lee<sup>1</sup>, Junho Lee<sup>1</sup>, Hye-Jung Yoon<sup>2</sup>, Hee Kyung Park<sup>3</sup>, Jongsik Chun<sup>4\*</sup>, Youngnim Choi<sup>1\*</sup>

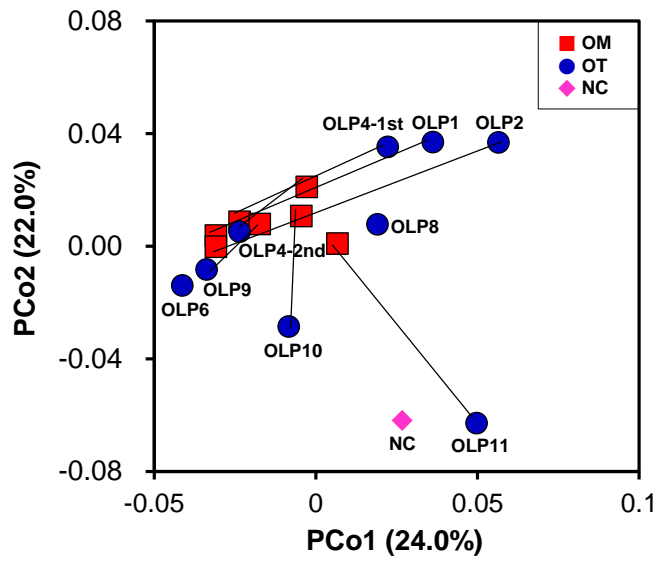

Supplementary Figure S1. A PCoA plot including the 2 tissue samples (OLP6 and OLP8) that lacked matching mucosal samples.

|                                               | OM    |       |          |          |       |       | OT    |       |       |          |          |       |       |       | NC    |       |       |
|-----------------------------------------------|-------|-------|----------|----------|-------|-------|-------|-------|-------|----------|----------|-------|-------|-------|-------|-------|-------|
|                                               | OLP1  | OLP2  | OLP4-1st | OLP4-2nd | OLP9  | OLP10 | OLP11 | OLP1  | OLP2  | OLP4-1st | OLP4-2nd | OLP9  | OLP10 | OLP11 |       | OLP6  | OLP8  |
| <i>Streptococcus pneumoniae</i> group         | 0.03  | 0     | 0.01     | 7.94     | 25.66 | 6.95  | 10.21 | 0     | 0     | 0        | 16.48    | 41.10 | 7.99  | 1.06  | 0.12  | 0.40  | 0.01  |
| <i>Haemophilus parainfluenzae</i> group       | 19.99 | 9.31  | 6.75     | 16.95    | 25.39 | 12.66 | 1.81  | 8.47  | 5.27  | 3.03     | 12.49    | 8.00  | 3.99  | 0     | 0.32  | 27.93 | 0.01  |
| <i>Neisseria perflava</i>                     | 0.12  | 0.05  | 1.78     | 16.58    | 0.93  | 0.33  | 8.86  | 1.07  | 1.49  | 0.54     | 10.27    | 0.29  | 3.64  | 0.09  | 0     | 6.60  | 0     |
| <i>Lautropia mirabilis</i>                    | 1.11  | 2.25  | 2.86     | 1.37     | 8.27  | 0.83  | 8.96  | 3.37  | 0.22  | 0.11     | 0.03     | 1.76  | 0.05  | 0.35  | 0.53  | 0.04  | 0     |
| <i>Fusobacterium nucleatum</i> group          | 1.02  | 0.59  | 1.34     | 2.47     | 1.99  | 9.55  | 7.38  | 0.54  | 0.15  | 0.11     | 0.01     | 1.39  | 0     | 0     | 0.55  | 0     | 0     |
| <i>Porphyromonas gingivalis</i>               | 0.46  | 0.15  | 0.03     | 0        | 1.36  | 0.10  | 10.88 | 1.39  | 2.82  | 0.47     | 0        | 0     | 0     | 0     | 0.22  | 0     | 0     |
| <i>Streptococcus parasanguinis</i> group      | 3.83  | 1.73  | 3.37     | 2.00     | 1.17  | 2.16  | 2.89  | 0.48  | 0.37  | 1.52     | 11.75    | 0.25  | 1.05  | 0     | 0.07  | 0     | 0     |
| <i>Rothia dentocariosa</i>                    | 0.28  | 0.18  | 7.52     | 12.89    | 1.93  | 3.98  | 0.32  | 0.20  | 0     | 0.93     | 0.24     | 0     | 0.85  | 0     | 0.24  | 0     | 0     |
| <i>Escherichia coli</i> group                 | 0.08  | 0.59  | 0.24     | 0        | 0     | 0.01  | 0     | 51.95 | 64.19 | 21.71    | 0        | 0     | 4.99  | 3.82  | 0.04  | 2.62  | 0.01  |
| <i>KV831974_s</i> group ( <i>Rothia</i> )     | 0     | 0     | 0        | 3.93     | 0.07  | 0.27  | 0.81  | 0     | 0     | 0        | 16.20    | 0     | 2.70  | 0     | 0     | 0     | 0.03  |
| <i>Bacteroides vulgatus</i>                   | 0     | 0     | 0        | 0        | 0     | 0.01  | 0     | 0     | 0     | 0        | 0        | 0     | 0     | 12.11 | 0     | 0     | 1.73  |
| <i>Streptococcus sanguinis</i> group          | 1.04  | 8.80  | 5.60     | 0.71     | 1.18  | 5.28  | 2.89  | 0.91  | 0.67  | 0.45     | 0.07     | 0.78  | 0     | 0     | 0.62  | 0     | 0.01  |
| <i>Neisseria sicca</i> group                  | 0     | 1.43  | 0.33     | 0.07     | 0.22  | 3.04  | 3.62  | 0.04  | 0     | 0.02     | 0        | 1.44  | 0     | 0     | 0.15  | 0     | 0.32  |
| <i>Leptotrichia hongkongensis</i>             | 0.04  | 0.07  | 1.64     | 1.11     | 0.31  | 10.17 | 0.26  | 0     | 0     | 1.01     | 0.66     | 2.34  | 0.50  | 0     | 0.51  | 0.08  | 0     |
| <i>Capnocytophaga leadbetteri</i>             | 0.04  | 0.08  | 0.11     | 0.01     | 1.11  | 0.47  | 4.53  | 0.01  | 0     | 0        | 0        | 0.12  | 0     | 0     | 0.07  | 5.24  | 0     |
| <i>Rothia aeria</i>                           | 0.31  | 1.63  | 10.99    | 0.55     | 0.59  | 2.48  | 1.95  | 0.06  | 0.07  | 0.29     | 0.02     | 0     | 0     | 0     | 0     | 0     | 0     |
| <i>Streptococcus sinensis</i> group           | 0     | 0     | 0        | 3.99     | 0.37  | 0.17  | 0.77  | 0     | 0     | 0        | 9.92     | 0.62  | 0.80  | 0     | 0     | 0     | 0.05  |
| <i>Streptococcus salivarius</i> group         | 5.09  | 12.23 | 12.49    | 1.33     | 0.31  | 0.16  | 0.26  | 3.21  | 2.97  | 8.76     | 0.38     | 1.89  | 0     | 0     | 12.12 | 0.16  | 0     |
| <i>Gemella haemolysans</i> group              | 1.67  | 1.46  | 0.24     | 0.48     | 6.88  | 0.80  | 0.94  | 0.04  | 0.15  | 0.06     | 0.15     | 8.94  | 0     | 0.38  | 4.20  | 2.62  | 0     |
| <i>Rothia muclifaginosa</i> group             | 1.14  | 1.86  | 7.68     | 0        | 0.89  | 0.02  | 0     | 1.35  | 2.15  | 43.45    | 0.02     | 0     | 0     | 0     | 0.04  | 0.20  | 0     |
| <i>Streptococcus pseudopneumoniae</i>         | 25.31 | 6.12  | 3.67     | 0        | 0     | 0     | 0     | 1.05  | 0.22  | 0.16     | 0        | 0     | 0     | 0     | 44.40 | 2.90  | 0     |
| <i>KE159600_s</i> ( <i>Lachnospiraceae</i> )  | 0     | 0     | 0        | 0        | 0     | 0     | 0     | 0     | 0     | 0        | 0        | 0     | 0     | 6.83* | 0     | 0     | 0.40  |
| <i>JQ463704_s</i> ( <i>Corynebacterium</i> )  | 0     | 0     | 0        | 1.33     | 0.60  | 3.33  | 1.41  | 0     | 0     | 0        | 0        | 0     | 0     | 0     | 0     | 0     | 0     |
| <i>PAC001350_s</i> ( <i>Leptotrichia</i> )    | 0     | 0     | 0        | 1.43     | 0.19  | 5.76  | 0.17  | 0     | 0     | 0        | 0.25     | 0     | 0     | 0     | 0     | 0     | 0     |
| <i>Porphyromonas endodontalis</i>             | 0     | 0.01  | 0.17     | 0        | 0.06  | 0.32  | 2.66  | 0.01  | 0     | 0        | 0        | 0     | 0     | 0     | 0.54  | 0     | 0     |
| <i>Lactobacillus plantarum</i> group          | 0     | 0     | 0        | 0        | 0     | 0.02  | 0     | 0     | 0     | 0        | 0        | 0     | 4.99  | 0     | 0     | 0     | 15.29 |
| <i>Faecalibacterium prausnitzii</i> group     | 0     | 0     | 0        | 0        | 0     | 0     | 0.01  | 0     | 0     | 0        | 0        | 0     | 0     | 4.84  | 0     | 0     | 1.45  |
| <i>Haemophilus parahaemolyticus</i> group     | 0     | 0     | 0        | 0.01     | 1.08  | 2.50  | 1.09  | 0     | 0     | 0        | 0        | 3.98  | 0.15  | 0     | 0     | 0     | 0     |
| <i>Enterobacter_uc</i>                        | 0     | 0     | 0        | 0        | 0     | 0     | 0     | 0     | 0     | 0        | 0        | 0     | 0     | 4.97  | 0     | 0     | 0     |
| <i>Runella slithyformis</i>                   | 0     | 0     | 0        | 0        | 0     | 0     | 0     | 0     | 0     | 0        | 0        | 0     | 0     | 4.93  | 0     | 0     | 0     |
| <i>Aureimonas jatrophae</i> group             | 0     | 0     | 0        | 0        | 0     | 0     | 0     | 0     | 0     | 0        | 0        | 0     | 0     | 4.86  | 0     | 0     | 0     |
| <i>Lachnospiraceae_uc_s</i>                   | 0     | 0     | 0        | 0        | 0     | 0     | 0     | 0     | 0     | 0        | 0        | 0     | 0     | 4.76* | 0     | 0     | 0.06  |
| <i>Neisseria subflava</i>                     | 6.73  | 0.46  | 0.41     | 0.26     | 0.43  | 0.19  | 0.69  | 3.52  | 3.27  | 0.97     | 0.61     | 1.15  | 0     | 0     | 0.04  | 0     | 0     |
| <i>Mucispirillum schaedleri</i>               | 0     | 0     | 0        | 0        | 0     | 0     | 0     | 0     | 0     | 0        | 0        | 0     | 0     | 4.19* | 0     | 0     | 0.67  |
| <i>Megamonas rupellensis</i> group            | 0     | 0     | 0        | 0        | 0     | 0     | 0     | 0     | 0     | 0        | 0        | 0     | 0     | 4.34* | 0     | 0     | 0.17  |
| <i>AY134896_s</i> ( <i>Leptotrichia</i> )     | 0.01  | 0     | 0.01     | 0        | 0.10  | 4.94  | 0     | 0     | 0     | 0        | 0        | 0.10  | 0     | 0     | 0     | 0     | 0     |
| <i>Streptococcus dentisani</i>                | 0.16  | 14.88 | 3.76     | 0        | 0     | 0     | 0     | 0.09  | 0.30  | 0.08     | 0        | 0     | 0     | 0     | 1.74  | 4.21  | 0     |
| <i>Weissella confusa</i> group                | 0     | 0     | 0        | 0        | 0     | 0     | 0     | 0     | 0     | 0        | 0        | 0     | 0     | 3.86  | 0     | 0     | 0     |
| <i>Streptococcus anginosus</i> group          | 0     | 0.18  | 0.29     | 0.19     | 0.56  | 0.02  | 0.04  | 0     | 0     | 0.05     | 0        | 1.27  | 0     | 2.80  | 0.23  | 0     | 0     |
| <i>Bacteroides coprophilus</i>                | 0     | 0     | 0        | 0        | 0     | 0     | 0     | 0     | 0     | 0        | 0        | 0     | 0     | 3.15* | 0     | 0     | 0.34  |
| <i>Microcystis aeruginosa</i> group           | 0     | 0     | 0        | 0        | 0     | 0     | 0     | 0     | 0     | 0        | 0        | 0     | 0     | 3.02  | 0     | 0     | 0     |
| <i>Porphyromonas pasteri</i>                  | 0     | 0     | 0        | 0.36     | 0.52  | 0.06  | 0.27  | 0     | 0     | 0        | 3.31     | 0.12  | 0.20  | 0     | 0     | 0     | 0     |
| <i>PAC001149_s</i> ( <i>Lachnospiraceae</i> ) | 0     | 0     | 0        | 0        | 0     | 0     | 0     | 0     | 0     | 0        | 0        | 0     | 0     | 2.82  | 0     | 0     | 0     |
| <i>PAC001356_s</i> ( <i>Leptotrichia</i> )    | 0     | 0     | 0        | 0.39     | 0.12  | 0.03  | 0     | 0     | 0     | 0        | 4.07     | 5.33  | 0     | 0     | 0     | 0     | 0     |
| <i>PAC001244_s</i> ( <i>Eubacterium_g8</i> )  | 0     | 0     | 0        | 0        | 0     | 0     | 0     | 0     | 0     | 0        | 0        | 0     | 0     | 2.66  | 0     | 0     | 0     |
| <i>Streptococcus mitis</i>                    | 7.04  | 4.04  | 1.01     | 0        | 0     | 0     | 0     | 0.48  | 0.37  | 0.06     | 0        | 0     | 0     | 0     | 12.60 | 2.50  | 0     |
| <i>Lactobacillus helveticus</i> group         | 0     | 0     | 0        | 0        | 0     | 0.01  | 0.002 | 0     | 0     | 0        | 0        | 0     | 0     | 0     | 0     | 0     | 6.63  |
| <i>PAC001304_s</i> ( <i>Prevotella</i> )      | 0     | 0     | 0        | 0        | 0     | 0     | 0     | 0     | 0     | 0        | 0        | 0     | 0     | 1.28* | 0     | 0     | 2.64  |
| <i>Capnocytophaga_uc</i>                      | 0     | 0.03  | 0.02     | 0.04     | 0.30  | 0.10  | 0.09  | 0     | 0     | 0        | 2.59     | 0     | 0     | 0     | 0     | 0.16  | 0     |
| <i>CP006776_s</i> ( <i>Streptococcus</i> )    | 5.79  | 0.70  | 0.41     | 0        | 0     | 0     | 0     | 3.41  | 0.30  | 0.19     | 0        | 0     | 0     | 0     | 0     | 0     | 0     |
| <i>Neisseria oralis</i>                       | 0     | 5.30  | 1.27     | 0.19     | 0.45  | 0     | 0.01  | 0     | 0     | 0        | 0        | 0     | 0     | 0     | 0     | 0     | 0     |
| <i>Streptococcus infantis</i>                 | 3.44  | 0.93  | 1.11     | 0        | 0     | 0     | 0     | 3.48  | 0.82  | 0.42     | 0        | 0     | 0     | 0     | 0.09  | 2.42  | 0     |
| <i>Haemophilus paraphrohaemolyticus</i>       | 1.44  | 3.15  | 0.12     | 0        | 0     | 0     | 0     | 0.01  | 0     | 0        | 0        | 0     | 0     | 0     | 7.73  | 0     | 0     |
| <i>Weissella kandleri</i> group               | 0     | 0     | 0        | 0        | 0     | 0.23  | 0     | 0     | 0     | 0        | 0        | 0     | 0     | 27.06 | 0     | 0     | 0     |
| <i>AF432138_s</i> ( <i>Leptotrichia</i> )     | 0     | 0.06  | 0.24     | 0        | 0     | 0     | 0     | 0.04  | 0     | 3.15     | 0        | 0     | 0     | 0     | 0     | 0     | 0     |
| <i>Lactobacillus sakei</i> group              | 0     | 0     | 0        | 0        | 0     | 0.02  | 0     | 0     | 0     | 0        | 0        | 0     | 7.94  | 0.01  | 0     | 0     | 0     |
| <i>Leuconostoc gelidum</i> group              | 0     | 0     | 0        | 0        | 0     | 0.04  | 0     | 0     | 0     | 0        | 0        | 0     | 4.14  | 0     | 0     | 0     | 0.02  |
| <i>4P003122_s</i> ( <i>Pasteurellaceae</i> )  | 0.26  | 0.24  | 0.01     | 0        | 0     | 0     | 0     | 0     | 0     | 0        | 0        | 0     | 0     | 0     | 2.92  | 0     | 0     |

>50% ≥20% ≥10% ≥5% ≥2.5% <2.5%

Supplementary Figure S2. A heat map showing dominant species that were present > 2.5% in any sample. An asterisk indicates contaminant.

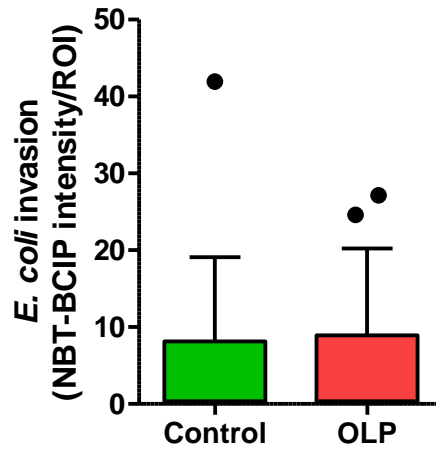

**Supplementary Figure S3. Detection of *E. coli* invasion in control and OLP tissues.** The mean intensity of bacterial signals in entire region including epithelia and lamina propria of control and OLP tissues was analyzed using ImageJ software. ROI, region of interest.

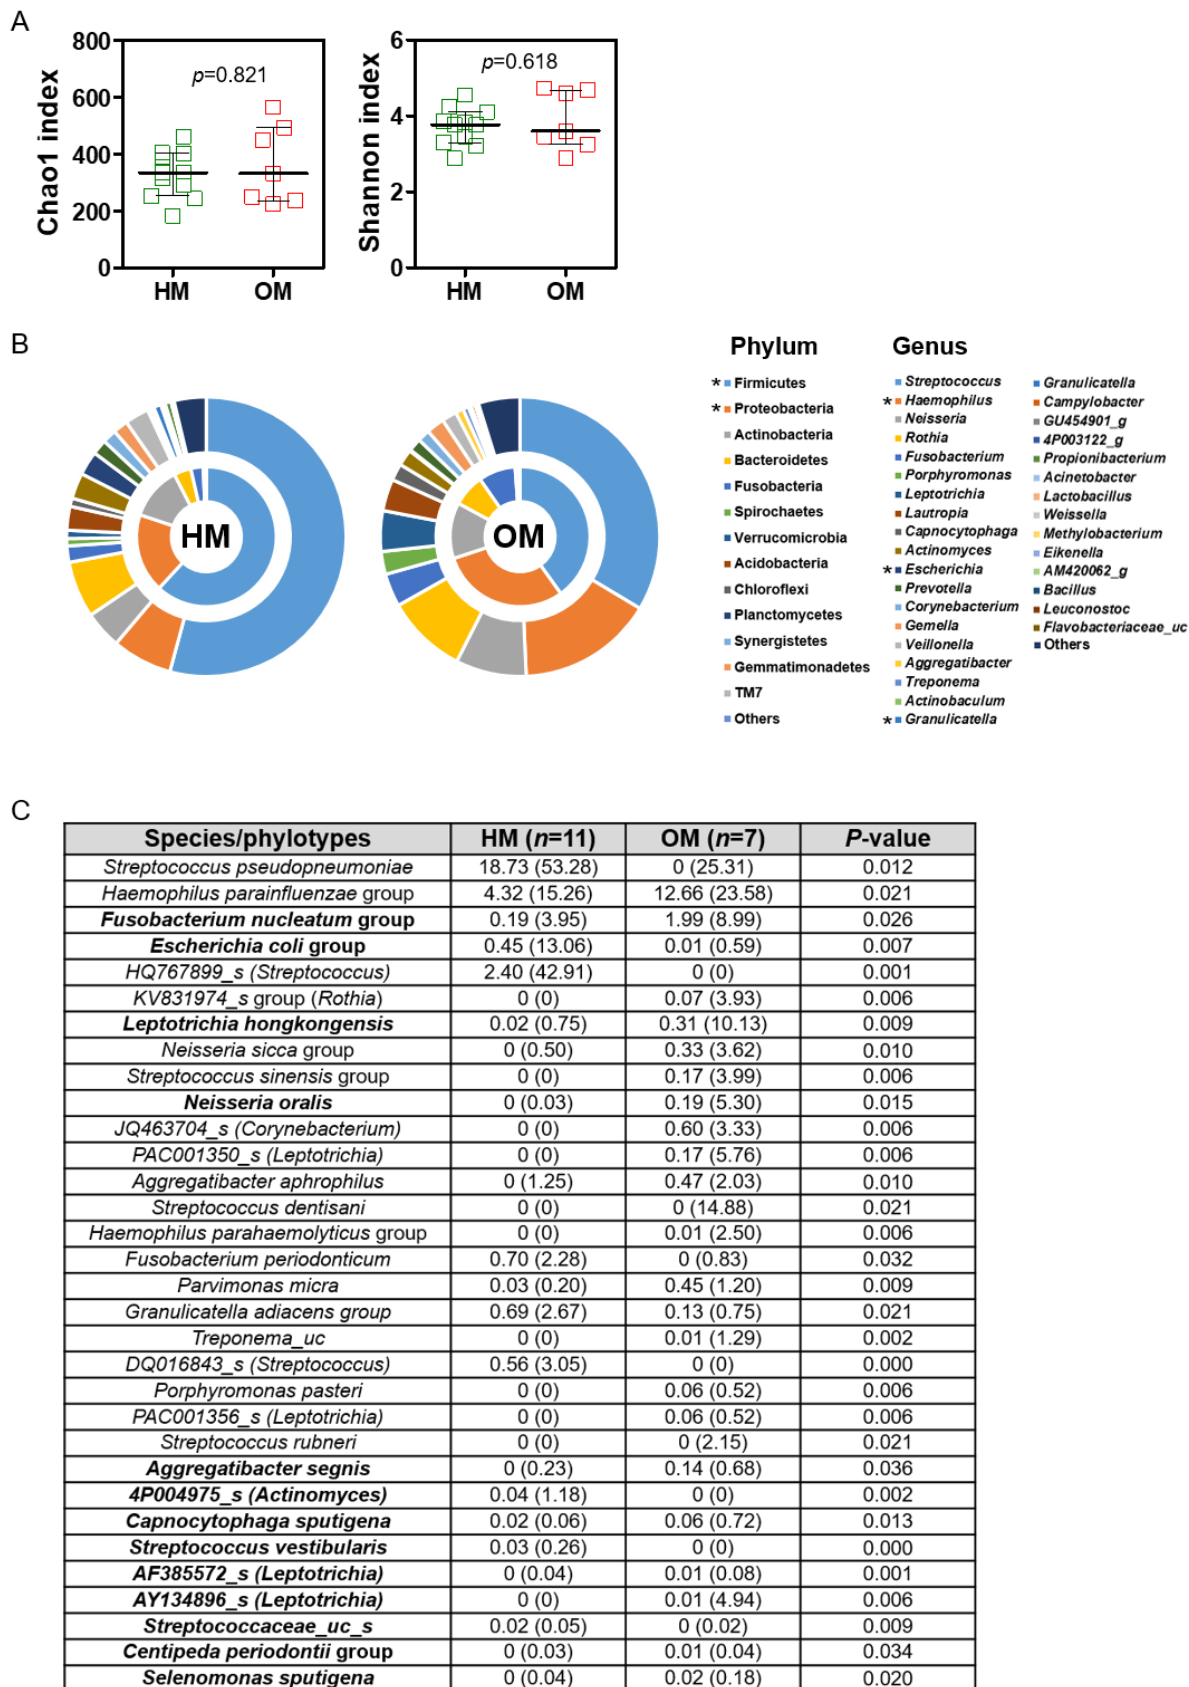

**Supplementary Figure S4. Altered mucosal microbiota in OLP.** Bacterial communities of buccal mucosal samples of OLP lesions ( $n=7$ ) were compared with those of healthy individuals ( $n=11$ ) obtained in our previous study.<sup>6</sup> (A) The species richness and microbial diversity estimated by the Chao1 and Shannon diversity index, respectively ( $p$  by Mann-Whitney U test). (B) The double pie charts display the mean relative abundances of dominant phyla and genera ( $*p < 0.05$  by Mann-Whitney U test). (C) Species/phylotypes differently distributed between the healthy and OLP groups ( $*p < 0.05$  by Mann-Whitney U test) expressed as median and range. Species coincided with the previous results are bolded.

|      | K12-7.1 | K12-7.2 | K12-7.3 | K12-5.1 | K-12 MG1655 | K12-ER3454 | BL21(DE3) | 13E0767 | 2457T   | DSM 103246 | Sakai   | CFT073  | Nissle 1917 | JJ2434  | KF1     |         |
|------|---------|---------|---------|---------|-------------|------------|-----------|---------|---------|------------|---------|---------|-------------|---------|---------|---------|
| FimA | Present | Present | Present | Present | Present     | Present    | Present   | Present | Present | Present    | Present | Present | Present     | Present | Present | Present |
| FimB | Present | Present | Present | Present | Present     | Present    | Present   | Present | Present | Absent     | Present | Present | Present     | Present | Present | Present |
| FimC | Present | Present | Present | Present | Present     | Present    | Present   | Present | Present | Present    | Present | Present | Present     | Present | Present | Present |
| FimD | Present | Present | Present | Present | Present     | Present    | Present   | Present | Present | Present    | Present | Present | Present     | Present | Present | Present |
| FimE | Present | Present | Present | Present | Present     | Present    | Present   | Present | Present | Absent     | Present | Present | Present     | Present | Present | Present |
| FimF | Present | Present | Present | Present | Present     | Present    | Present   | Present | Present | Present    | Present | Present | Present     | Present | Present | Present |
| FimG | Present | Present | Present | Present | Present     | Present    | Present   | Present | Present | Present    | Present | Present | Present     | Present | Present | Present |
| FimH | Present | Present | Present | Present | Present     | Present    | Present   | Present | Present | Present    | Present | Present | Present     | Present | Present | Present |

 Present  
 Absent

**Supplementary Figure S5. Distribution of type 1 pilus-encoding genes**

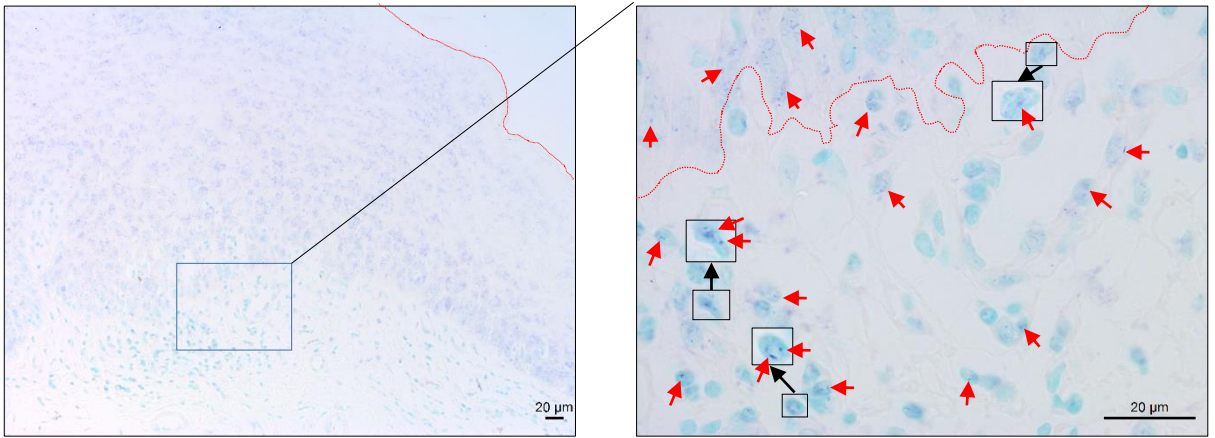

**Supplementary Figure S6. Detection of *E. coli* by *in situ* hybridization in control tissue from a patient with suspected OLP** Dotted red lines: outline of epithelium, red arrows: *in situ* signals for *E. coli*, rectangles: representative infected cells in the lamina propria are shown in higher magnification.
